# Supplementary material
Source: PubMed Central journal article supplement (PMC7810168)

**eTable 1.** Definitions of the Components of the Metabolic Syndrome according to the National Institutes of Health criteria

**eFigure 1.** Flowchart of Study Exclusions

**eFigure 2.** Distribution of Global Brain Amyloid SUVR and SUVR threshold (SUVR=1.34) determined by the K-means clustering method (n=350)

**eFigure 3.** Unadjusted Scatterplots of Continuous Global Brain Amyloid SUVR (Panel A) and Cortical Thickness in the AD Signature Region (Panel B) with Each Metabolic Syndrome Component (i=fasting glucose, ii=waist circumference, iii=triglycerides, iv=HDL cholesterol, v=systolic blood pressure, vi=diastolic blood pressure) Categorized as “Normal” or “At risk” Based on NIH Criteria.

**eTable 1. Definitions of the Components of the Metabolic Syndrome**

| <b>Component</b>                    | <b>Laboratory Values</b>                                              | <b>Medications</b>                                                                                                                                                                                                                           |
|-------------------------------------|-----------------------------------------------------------------------|----------------------------------------------------------------------------------------------------------------------------------------------------------------------------------------------------------------------------------------------|
| <b>Elevated Waist Circumference</b> | Men: 40 inches (102 centimeters)<br>Women: 35 inches (89 centimeters) | N/A                                                                                                                                                                                                                                          |
| <b>Elevated Triglycerides</b>       | $\geq 150$ mg/dL (1.7 mmol/L)                                         | Fenofibrates<br>Gemfibrozil                                                                                                                                                                                                                  |
| <b>Reduced HDL cholesterol</b>      | Men: <40 mg/dL (1.04 mmol/L)<br>Women: <50 mg/dL (1.3 mmol/L)         | HMG-CoA reductase inhibitors (statins)<br>Bile acids<br>Ezetimibe<br>Fibrates                                                                                                                                                                |
| <b>Elevated Blood Pressure</b>      | $\geq 130/85$ mmHg                                                    | Betablockers<br>Angiotensin Converting Enzyme (ACE) inhibitors<br>Angiotensin Receptor Blockers (ARB)<br>Diuretics<br>Calcium channel blockers<br>Vasodilators                                                                               |
| <b>Elevated Fasting Glucose</b>     | $\geq 100$ mg/dL                                                      | Metformin<br>Sulfonylureas<br>Dipeptidyl peptidase 4 (DPP-4) inhibitors<br>Peroxisome proliferator-activator $\gamma$ (PPAR- $\gamma$ ) agonists<br>Glucagon Like Peptide 1 (GLP1) agonists<br>Sodium glucose transport 2 (SGLT2) inhibitors |

**eFigure 1. Flowchart of Study Exclusions**

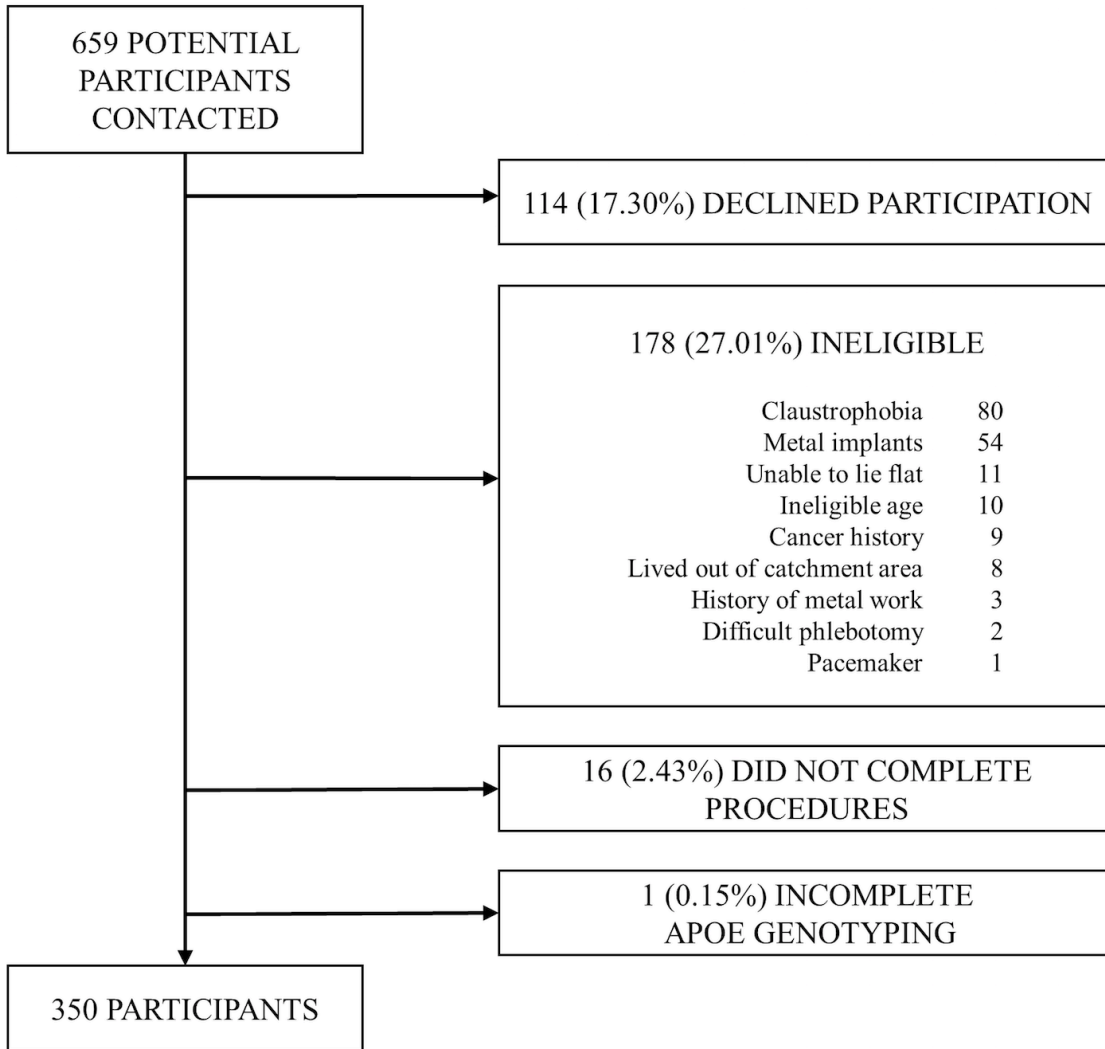

**eFigure 2. Distribution of Global Brain Amyloid SUVR and SUVR threshold (SUVR=1.34) determined by the K-means clustering method.**

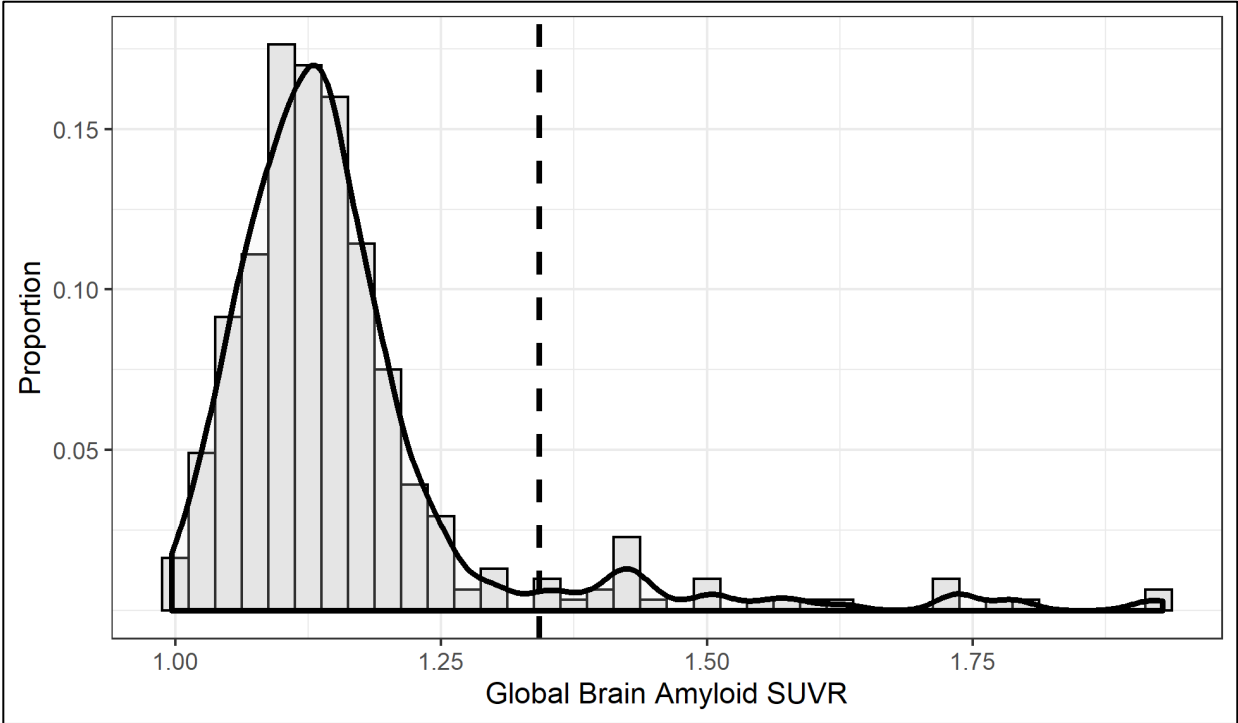

**eFigure 3. Unadjusted Scatterplots of Continuous Global Brain Amyloid SUVR (Panel A) and Cortical Thickness in the AD Signature Region (Panel B) with Each Metabolic Syndrome Component (i=fasting glucose, ii=waist circumference, iii=triglycerides, iv=HDL cholesterol, v=systolic blood pressure, vi=diastolic blood pressure) Categorized as “Normal” or “At risk” Based on NIH Criteria.**

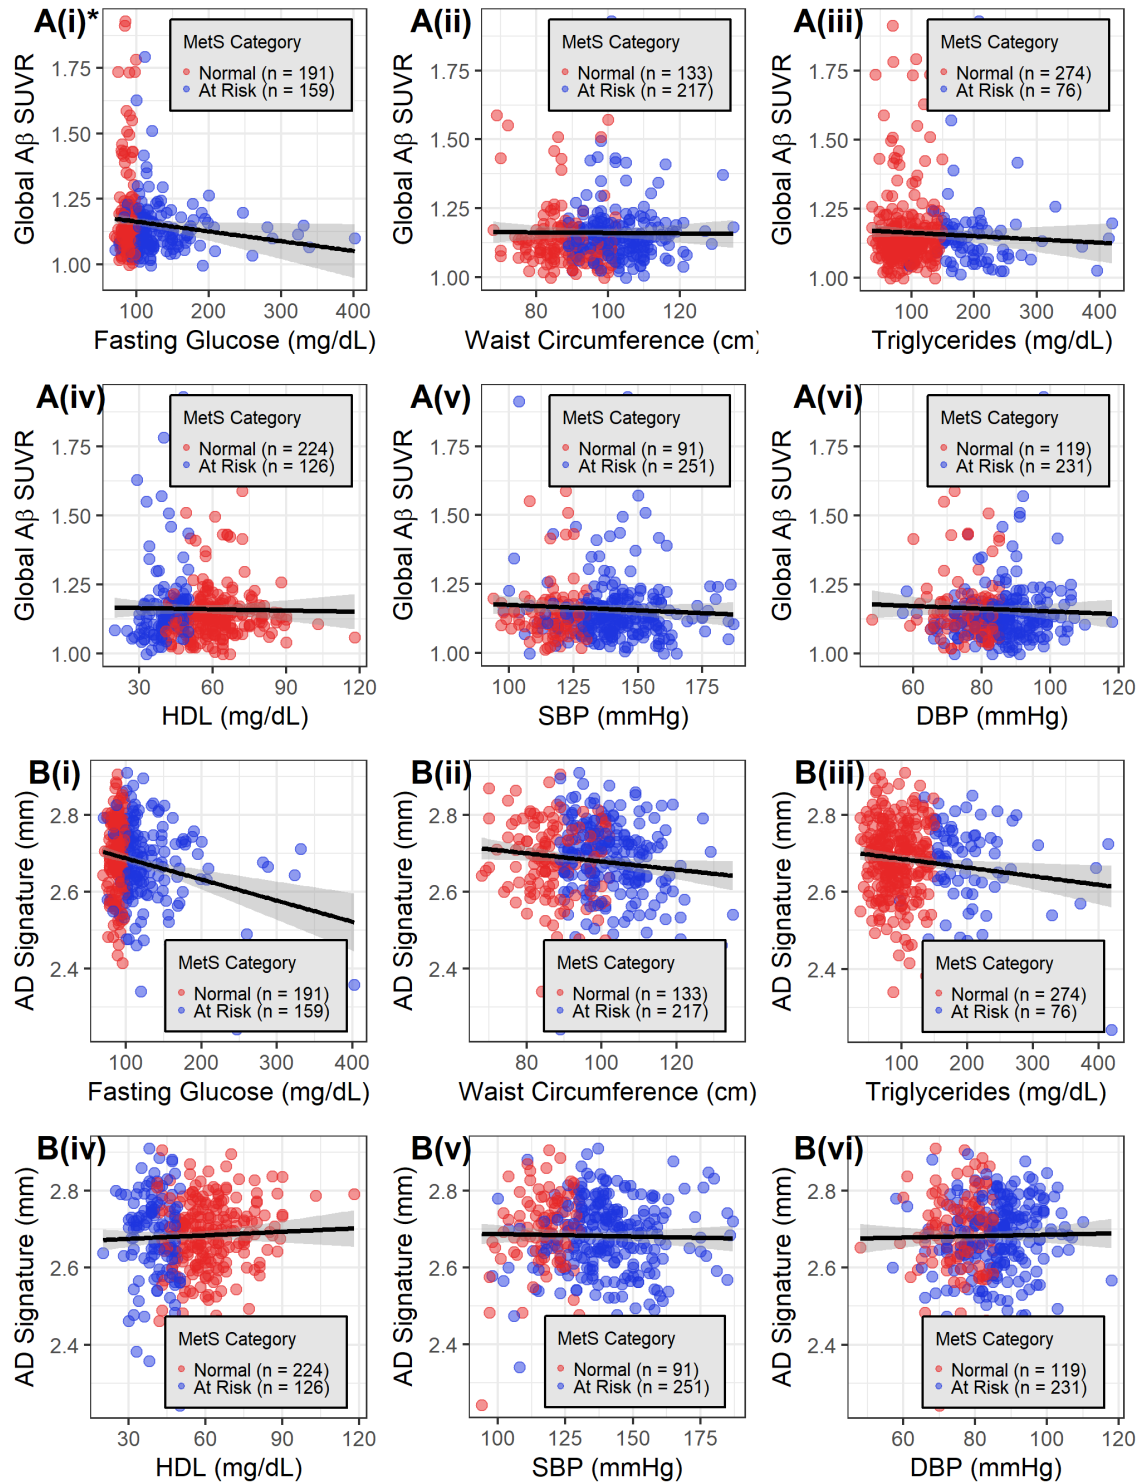

Supplement: NIHMS1638341-supplement-1.pdf [file NIHMS1638341-supplement-1.pdf]
